# Supplementary material for: Facile synthesis of uniform N-doped carbon-coated TiO2 hollow spheres with enhanced lithium storage performance
Source: Royal Society of Chemistry journal article supplement (doi:10.1039/d0nr07659g), 2021-01-01
Supplement: d0nr07659g1.pdf [file d0nr07659g1.pdf]

## Supplementary Information

### Facile synthesis of Uniform N-doped Carbon-Coated TiO<sub>2</sub> Hollow Spheres with Enhanced Lithium Storage Performances

Mengna Fan<sup>a</sup>, Zhonghu Yang<sup>a</sup>, Zhihua Lin<sup>a</sup>, Xunhui Xiong<sup>a,\*</sup>

<sup>a</sup> Guangzhou Key Laboratory of Surface Chemistry of Energy Materials, New Energy Research Institute, School of Environment and Energy, South China University of Technology, Guangzhou 510006, China

#### 1. Experimental

##### 1.1. Method

Synthesis of TiO<sub>2</sub> hollow spheres: TiO<sub>2</sub> hollow spheres are synthesized through the ‘wet conversion’ method. In our experiment, 1 ml industrial titanyl sulfate solution ( $c(\text{TiOSO}_4) = 480 \text{ g L}^{-1}$ ,  $c(\text{Fe}^{2+}) = 48 \text{ g L}^{-1}$ ,  $c(\text{Mn}^{2+}) = 0.77 \text{ g L}^{-1}$ ) used in our previous work<sup>1</sup>, and 18 g H<sub>2</sub>SO<sub>4</sub> ( $c(\text{H}^+) = 1 \text{ mol L}^{-1}$ ) were added in 800 mL deionized water at 35 °C. Then, 0.1 g Al powder (50-200 nm in diameter, Hongwu New Material) was added and stirred for 3 hours until the solution turned from dark gray to light gray. After filtrating and drying, the sample was added to the 50 mL NaOH (0.2 mol L<sup>-1</sup>) in 500 mL deionized water and stirred overnight. Finally, TiO<sub>2</sub> hollow sphere was obtained by filtration and drying process.

Synthesis of TiO<sub>2</sub>@C materials: TiO<sub>2</sub> precursors were dispersed in Tris-buffer solution (0.1 M, 100 mL) by sonication, and then 0.1 g dopamine hydrochloride were added and stirred for 3 hours at room temperature. After centrifuging and washing with deionized water and ethanol for three times, respectively, the sample was collected and further dried at 60 °C overnight. Finally, the precursors were obtained by annealing at 400 °C for 3 h in an Ar/H<sub>2</sub> atmosphere.

##### 1.2. Material characterization

The X-ray diffraction measurements were conducted on Rigaku D/max 2500 using

Cu Ka radiation and the  $2\theta$  range of tests was from the range of  $10^{\circ}$ - $90^{\circ}$ . Raman and XPS measurement were performed by Renishaw RM1000 micro spectroscopic system and Thermo K-Alpha XPS spectrometer respectively. Thermogravimetric analysis (TGA) was performed in the air with the temperature range from  $30^{\circ}\text{C}$  to  $800^{\circ}\text{C}$ . The materials morphologies were measured by FESEM (Hitachi S-4800) and TEM (JEM-2010 JEOL, 200 kV). Brunauer-Emmett-Teller (BET) specific surface areas were obtained using a JW-BK200C Surface Area and Pore size Analyzer (Beijing JWGB Sci. & Tech. Co., Ltd) at the liquid-nitrogen boiling point (77 K).

### **1.3. Electrochemical measurements**

The lithium storage performances of all samples were characterized by fabricating CR2032 coin-type half-cells in an Ar glove box. The anode electrode was prepared by mixing the active material with super P and polyvinylidene fluoride (PVDF) according to a mass ratio of 6:2:2 in N-methyl-2-pyrrolidone. The obtained slurry was cast onto a copper (Cu) foil and then dried at  $110^{\circ}\text{C}$  under vacuum for 12 h. Generally, the mass loading of the active material is about packing density of  $\sim 0.5\text{ mg cm}^{-2}$ . A solution of 1 M  $\text{LiPF}_6$  in EC: DMC: EMC=1:1:1 Vol% is selected as the electrolyte. CV measurements were carried out by a CHI660E electrochemical workstation. LAND-BT2013A measurement system is responded for testing cycling performance and rate capacity at  $25^{\circ}\text{C}$ .

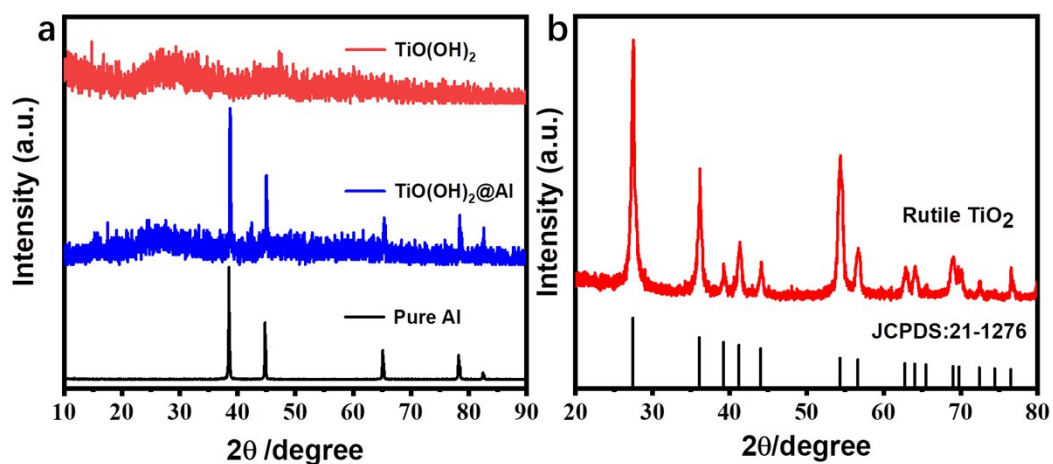

**Fig. S1** XRD patterns of precursors at different stages (a) and  $\text{TiO}_2$  (b) annealed at  $700\text{ }^\circ\text{C}$ .

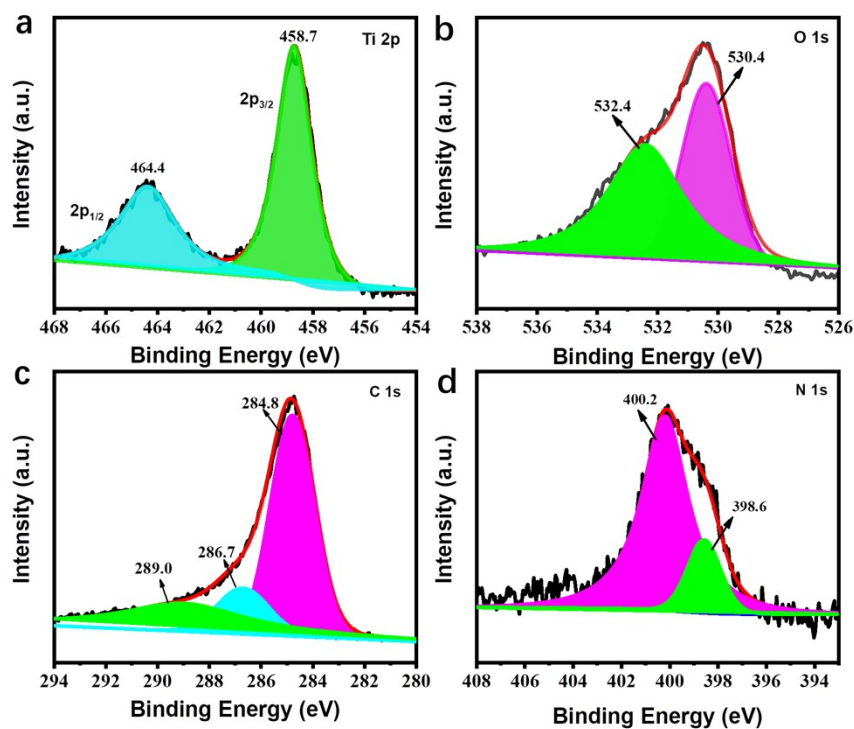

**Fig. S2** High resolution XPS spectra of Ti 2p (a), O 1s (b), C 1s (c), N 1s (d) in  $\text{TiO}_2@\text{C}$ , respectively.

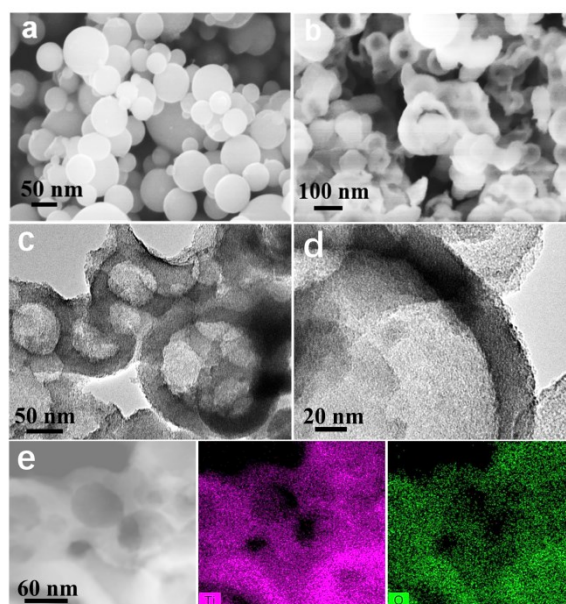

**Fig. S3** SEM images of (a) Al powers, (b) TiO(OH)<sub>2</sub>@Al; (c)-(d) TEM images of pure TiO<sub>2</sub>; (e) elemental mapping images of Ti and O of TiO<sub>2</sub> hollow spheres.

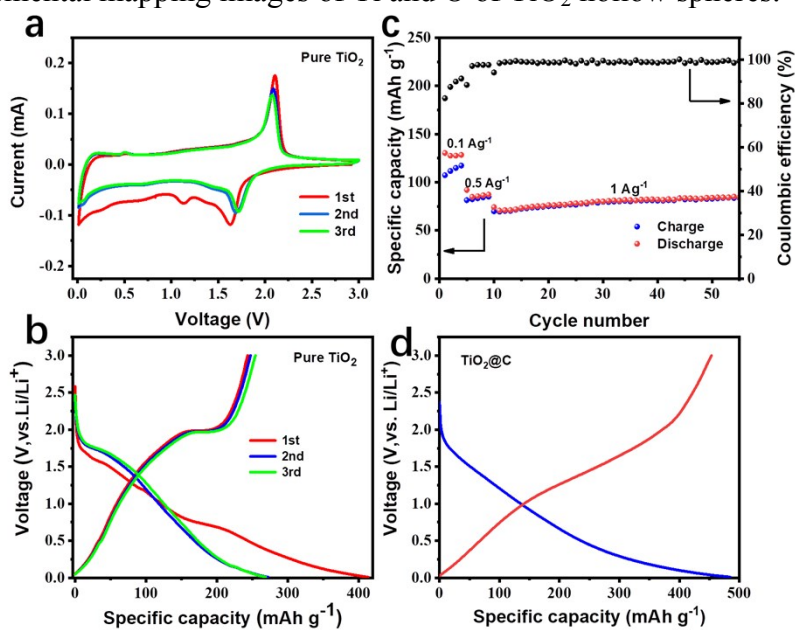

**Fig. S4** (a) Cyclic voltammogram of pure TiO<sub>2</sub> at a scanning rate of 0.2 mV s<sup>-1</sup>; (b) Charge/discharge curves of pure TiO<sub>2</sub> at 0.1 A g<sup>-1</sup>; (c) the rate capability and the cycle performances of rutile TiO<sub>2</sub>; (d) the initial charge-discharge curve of TiO<sub>2</sub>@C after chemical prelithiation.

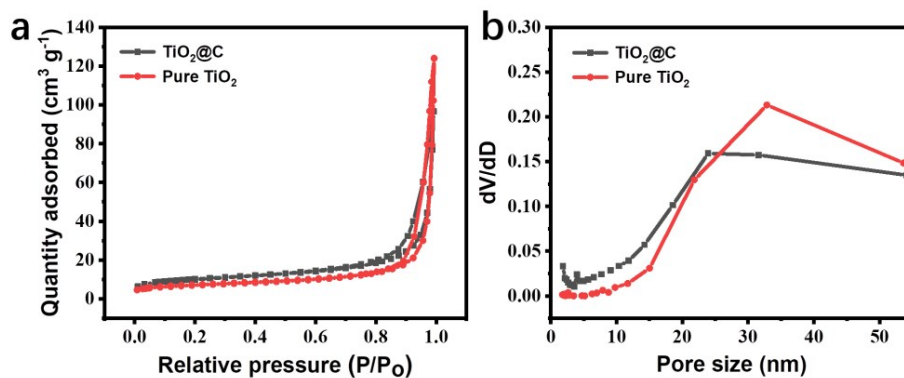

**Fig. S5** (a) Nitrogen adsorption/desorption isotherms of  $\text{TiO}_2$  and  $\text{TiO}_2@\text{C}$ ; (b) Barrett-Joyner-Halenda (BJH) pore size distribution curves for  $\text{TiO}_2$  and  $\text{TiO}_2@\text{C}$ .

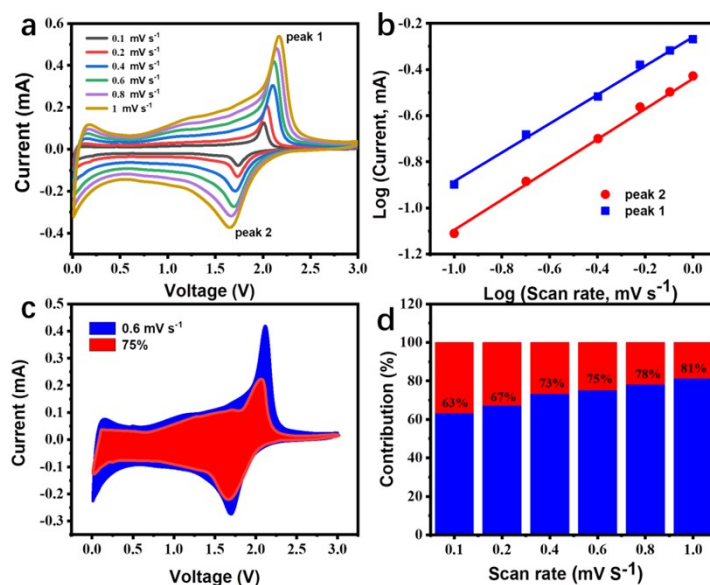

**Fig. S6** (a) CV curves of  $\text{TiO}_2$  at different scan rates; (b)  $\text{Log}(i)$  versus  $\text{log}(v)$  plots at different cathodic/anodic peaks for  $\text{TiO}_2$ ; (c) Contribution of the surface-driven process at  $0.6 \text{ mV s}^{-1}$  in  $\text{TiO}_2$ ; (d) Capacitance contribution of  $\text{TiO}_2$  at different scan rates.

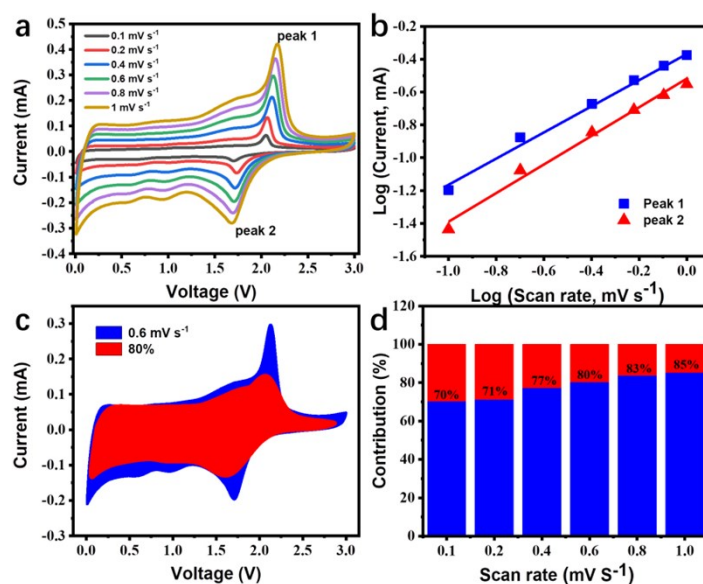

**Fig. S7** (a) CV curves of  $\text{TiO}_2@\text{C}$  at different scan rates; (b)  $\text{Log}(i)$  versus  $\text{log}(v)$  plots at different cathodic/anodic peaks for  $\text{TiO}_2@\text{C}$ ; (c) Contribution of the surface-driven process at  $0.6 \text{ mV s}^{-1}$  in  $\text{TiO}_2@\text{C}$ ; (d) Capacitance contribution of  $\text{TiO}_2@\text{C}$  at different scan rates.

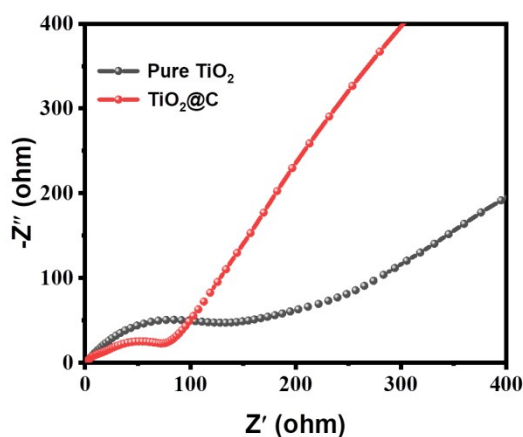

**Fig. S8** EIS of pure  $\text{TiO}_2$  and  $\text{TiO}_2@\text{C}$  after 3 cycles at  $0.1 \text{ A g}^{-1}$ .

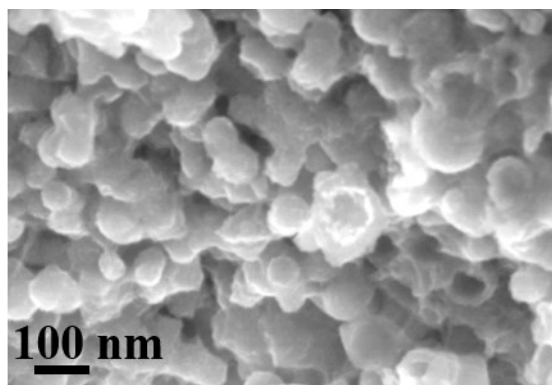

**Fig. S9** SEM image of  $\text{TiO}_2@\text{C}$  composites after 2000 cycles.

#### Reference

1 F. Wu, Z. Wang, X. Li, L. Wu, X. Wang, X. Zhang, Z. Wang, X. Xiong, H. Guo, *J. Alloys Compd.*, 2011, **509**, 596-601.
